# Supplementary material
Source: ML conference proceedings conference paper supplement (https://aclanthology.org/D19-1131)
Supplement: Attachment [file D19-1131.Attachment.zip]

# An Evaluation for Intent Classification and Out-of-Scope Prediction

## Supplementary Material

|                                                                                                                                                                                                                                                                                                                                                                 |
|-----------------------------------------------------------------------------------------------------------------------------------------------------------------------------------------------------------------------------------------------------------------------------------------------------------------------------------------------------------------|
| <b>Ask an AI questions about a topic domain</b><br>Suppose you have an intelligent device such as Amazon Alexa, Apple Siri, or Google Assistant.<br>Given a topic domain, please provide 5 different things you might ask the intelligent device.<br><b>Topic Domain:</b> “assume the intelligent device can answer questions related to tasks around the home” |
| <b>Rephrase an original question or statement</b><br>Suppose you have an intelligent device such as Amazon Alexa, Apple Siri, or Google Assistant.<br>Given an original phrase, provide 5 different ways of saying the same phrase.<br><b>Original phrase:</b> “how’s the weather”                                                                              |
| <b>Phrase a question or statement given a scenario</b><br>Suppose you have an intelligent device such as Amazon Alexa, Apple Siri, or Google Assistant.<br>Given a scenario, provide 5 different ways of asking or commanding the AI.<br><b>Scenario:</b> “suppose you want to go to a restaurant but you want to know how long of a wait there will be there”  |

Figure 1: Examples of *scoping* (top), *rephrase* (middle), and *scenario* crowdsourcing tasks for intents from three domains. Tasks used to collect out-of-scope data used the same format as the *scoping* and *scenario* tasks, but the out-of-scope tasks asked crowd workers for 2 phrases instead of 5.

### A Crowdsourcing Prompts

Example task descriptions for *scoping*, *scenario*, and *rephrase* tasks are shown in Figure 1. We used *scoping* and *scenario* tasks for collecting out-of-scope data. The out-of-scope tasks asked crowd workers for 2 phrases per task instead of 5 (i.e., 2 phrases per person per task instead of 5). We used the Amazon Mechanical Turk crowdsourcing platform.

### B Domains and Intents

The dataset domains are listed in Table 1. The tables displayed in the following pages of this doc-

| Domain           | Table |
|------------------|-------|
| BANKING          | 2     |
| CREDIT CARDS     | 3     |
| KITCHEN & DINING | 4     |
| HOME             | 5     |
| AUTO & COMMUTE   | 6     |
| TRAVEL           | 7     |
| UTILITY          | 8     |
| WORK             | 9     |
| SMALL TALK       | 10    |
| META             | 11    |
| OUT-OF-SCOPE     | 12    |

Table 1: Table IDs for each of the 10 in-scope domains, as well as for the out-of-scope data. Each table in the second column lists all 15 intents for each in-scope domain, as well as 3 sample queries from each intent. The out-of-scope table lists 45 random out-of-scope samples.

ument list all 15 intents for each in-scope domain, as well as 3 sample queries from each intent. The out-of-scope table lists 45 random out-of-scope samples.

Table 13 lists examples from the data used in the wiki aug *oos-binary* approach.

### C Classifier Model Details

We used grid search in all cases to find optimal hyperparameters. Optimal hyperparameters can be found in the file called `hyperparameters.csv`, which can be found in the repository at <https://github.com/clinc/oos-eval>.

| Domain  | Intent           | Query                                                                    |
|---------|------------------|--------------------------------------------------------------------------|
| BANKING | TRANSFER         | <i>move 100 dollars from my savings to my checking</i>                   |
|         | TRANSFER         | <i>put \$20000 into my checking account from my savings account</i>      |
|         | TRANSFER         | <i>send fifty dollars from me to carrie</i>                              |
| BANKING | TRANSACTIONS     | <i>how much did my last purchase cost</i>                                |
|         | TRANSACTIONS     | <i>what were my last five transactions on my visa card</i>               |
|         | TRANSACTIONS     | <i>what did i buy last</i>                                               |
| BANKING | BALANCE          | <i>what's my current bank account total</i>                              |
|         | BALANCE          | <i>how much do i have in my savings account</i>                          |
|         | BALANCE          | <i>how much is in my pnc account</i>                                     |
| BANKING | FREEZE ACCOUNT   | <i>may you stop a paymet on my account</i>                               |
|         | FREEZE ACCOUNT   | <i>please put a hold on my retirement account right now</i>              |
|         | FREEZE ACCOUNT   | <i>how can i stop transactions on my account</i>                         |
| BANKING | PAY BILL         | <i>can you give me a hand paying my water bill</i>                       |
|         | PAY BILL         | <i>pay my gas bill with my checking account</i>                          |
|         | PAY BILL         | <i>use my park bank account to pay my electric bill</i>                  |
| BANKING | BILL BALANCE     | <i>what's my bill for water and electricity</i>                          |
|         | BILL BALANCE     | <i>read my bill balances</i>                                             |
|         | BILL BALANCE     | <i>how much do i owe for my gas and phone bills</i>                      |
| BANKING | BILL DUE         | <i>tell me the last day i can pay my gas bill</i>                        |
|         | BILL DUE         | <i>when do i have to pay my internet</i>                                 |
|         | BILL DUE         | <i>when does my gas bill need paid by</i>                                |
| BANKING | INTEREST RATE    | <i>what interest rate does my checking account come with</i>             |
|         | INTEREST RATE    | <i>what's my checking account yielding in interest</i>                   |
|         | INTEREST RATE    | <i>i need help finding the apr on my aspire loan</i>                     |
| BANKING | ROUTING NUMBER   | <i>what is chase bank's routing number</i>                               |
|         | ROUTING NUMBER   | <i>where do i find my routing number for my pnc account</i>              |
|         | ROUTING NUMBER   | <i>where do i find the routing number for great western bank</i>         |
| BANKING | MINIMUM PAYMENT  | <i>what is my minimum verizon bill payment</i>                           |
|         | MINIMUM PAYMENT  | <i>what is the lowest amount i can pay for my cellphone bill</i>         |
|         | MINIMUM PAYMENT  | <i>lowest amount for cable bill</i>                                      |
| BANKING | ORDER CHECKS     | <i>how do i order more free checkbooks</i>                               |
|         | ORDER CHECKS     | <i>i just used my final check order more</i>                             |
|         | ORDER CHECKS     | <i>i need to know how to order checks for my bank of america account</i> |
| BANKING | PIN CHANGE       | <i>my checking account needs a new pin number</i>                        |
|         | PIN CHANGE       | <i>i need help changing my pin</i>                                       |
|         | PIN CHANGE       | <i>change my amex account pin to 1234</i>                                |
| BANKING | REPORT FRAUD     | <i>there are some questionable charges on my card</i>                    |
|         | REPORT FRAUD     | <i>there's a shady charge from comcast on my account</i>                 |
|         | REPORT FRAUD     | <i>i need to report fraudulent activity on my card</i>                   |
| BANKING | ACCOUNT BLOCKED  | <i>why is my bank account locked</i>                                     |
|         | ACCOUNT BLOCKED  | <i>what could cause a hold on my savings account</i>                     |
|         | ACCOUNT BLOCKED  | <i>it looks like my account is blocked but i have no clue why</i>        |
| BANKING | SPENDING HISTORY | <i>how much did i spend at restaurants last week</i>                     |
|         | SPENDING HISTORY | <i>how much money have i dropped recently</i>                            |
|         | SPENDING HISTORY | <i>what has gas cost me this week</i>                                    |

Table 2: Sample queries from the **BANKING** domain.

| Domain       | Intent                    | Query                                                                     |
|--------------|---------------------------|---------------------------------------------------------------------------|
| CREDIT CARDS | CREDIT SCORE              | <i>is my credit score high</i>                                            |
|              | CREDIT SCORE              | <i>how bad is my current credit score</i>                                 |
|              | CREDIT SCORE              | <i>what is my credit score</i>                                            |
| CREDIT CARDS | REPORT LOST CARD          | <i>my visa was stolen</i>                                                 |
|              | REPORT LOST CARD          | <i>i can't seem to find my gold card and want it reported as lost</i>     |
|              | REPORT LOST CARD          | <i>i want you to report my card as lost</i>                               |
| CREDIT CARDS | CREDIT LIMIT              | <i>how high is my credit limit for my old navy card</i>                   |
|              | CREDIT LIMIT              | <i>what is my spending limit on my chase sapphire card</i>                |
|              | CREDIT LIMIT              | <i>what is my credit limit looking like</i>                               |
| CREDIT CARDS | REWARDS BALANCE           | <i>i would like to check my rewards for my credit card"</i>               |
|              | REWARDS BALANCE           | <i>how many points do i have on my visa</i>                               |
|              | REWARDS BALANCE           | <i>how high are the rewards on my discover card</i>                       |
| CREDIT CARDS | NEW CARD                  | <i>can i apply for a discover card</i>                                    |
|              | NEW CARD                  | <i>i want to apply for a alphabank card</i>                               |
|              | NEW CARD                  | <i>help me get an american express card</i>                               |
| CREDIT CARDS | APPLICATION STATUS        | <i>how is the status of my credit card application coming along</i>       |
|              | APPLICATION STATUS        | <i>how far has my application for the hsbc card proceeded till now</i>    |
|              | APPLICATION STATUS        | <i>when will i know if my visa card application was approved</i>          |
| CREDIT CARDS | CARD DECLINED             | <i>why was my card not working at target</i>                              |
|              | CARD DECLINED             | <i>can you help me understand why my card got declined</i>                |
|              | CARD DECLINED             | <i>i could not buy food using my card when i was in vietnam</i>           |
| CREDIT CARDS | INTERNATIONAL FEES        | <i>does my visa have international transaction fees</i>                   |
|              | INTERNATIONAL FEES        | <i>will i be charged if i use my card in japan</i>                        |
|              | INTERNATIONAL FEES        | <i>if i use my card in england will it cost me extra</i>                  |
| CREDIT CARDS | APR                       | <i>is the apr on my credit card good</i>                                  |
|              | APR                       | <i>what's my apr on my discovery card</i>                                 |
|              | APR                       | <i>how much do i pay in apr on my amex card</i>                           |
| CREDIT CARDS | REDEEM REWARDS            | <i>i have credit card points but don't know how to use them</i>           |
|              | REDEEM REWARDS            | <i>how can i cash in rewards on my chase card</i>                         |
|              | REDEEM REWARDS            | <i>help me figure out redemption of my credit card points</i>             |
| CREDIT CARDS | CREDIT LIMIT CHANGE       | <i>can i change my credit limit</i>                                       |
|              | CREDIT LIMIT CHANGE       | <i>you need to tell me how to increase credit limit for my chase card</i> |
|              | CREDIT LIMIT CHANGE       | <i>how do i get my credit limit increased to \$1000</i>                   |
| CREDIT CARDS | DAMAGED CARD              | <i>my card was in my pocket and bent</i>                                  |
|              | DAMAGED CARD              | <i>i dropped my card in my gasoline and the printing wore off</i>         |
|              | DAMAGED CARD              | <i>my credit card snapped in half while i was fiddling with it</i>        |
| CREDIT CARDS | REPLACEMENT CARD DURATION | <i>how long until i get my replacement card</i>                           |
|              | REPLACEMENT CARD DURATION | <i>tell me the duration it takes to get a new cc</i>                      |
|              | REPLACEMENT CARD DURATION | <i>how long will a new card take to come in the mail</i>                  |
| CREDIT CARDS | IMPROVE CREDIT SCORE      | <i>what steps should i take to improve my credit score</i>                |
|              | IMPROVE CREDIT SCORE      | <i>what can i do to raise my credit score</i>                             |
|              | IMPROVE CREDIT SCORE      | <i>how do i keep my credit score from dropping</i>                        |
| CREDIT CARDS | EXPIRATION DATE           | <i>how soon does my visa card expire</i>                                  |
|              | EXPIRATION DATE           | <i>can you tell me if my credit card expires in the near future</i>       |
|              | EXPIRATION DATE           | <i>can you please tell me my card's expiration month</i>                  |

Table 3: Sample queries from the **CREDIT CARDS** domain.

| Domain           | Intent                  | Query                                                                      |
|------------------|-------------------------|----------------------------------------------------------------------------|
| KITCHEN & DINING | RECIPE                  | <i>find a recipe for baked ziti</i>                                        |
|                  | RECIPE                  | <i>how do i make lasagna</i>                                               |
|                  | RECIPE                  | <i>show me how to make tuna casserole please</i>                           |
| KITCHEN & DINING | RESTAURANT REVIEWS      | <i>do you know how the ratings are for yardhouse</i>                       |
|                  | RESTAURANT REVIEWS      | <i>i need to know if boston restaurant has favorable reviews</i>           |
|                  | RESTAURANT REVIEWS      | <i>how are people liking the sushi at yakamoto</i>                         |
| KITCHEN & DINING | CALORIES                | <i>what kind of calories do chicken tenders have</i>                       |
|                  | CALORIES                | <i>how many calories can i expect to be in fries</i>                       |
|                  | CALORIES                | <i>tell me how many calories in a medium size apple</i>                    |
| KITCHEN & DINING | NUTRITION INFO          | <i>tell me the nutritional info of a regular banana</i>                    |
|                  | NUTRITION INFO          | <i>how healthy is rice</i>                                                 |
|                  | NUTRITION INFO          | <i>i would like nutrition facts for spaghetti carbonara</i>                |
| KITCHEN & DINING | RESTAURANT SUGGESTION   | <i>can you suggest a restaurant for me to eat tonight</i>                  |
|                  | RESTAURANT SUGGESTION   | <i>what's a good place to eat chinese in san francisco</i>                 |
|                  | RESTAURANT SUGGESTION   | <i>i want sushi, is there any good place in ho chi minh</i>                |
| KITCHEN & DINING | INGREDIENTS LIST        | <i>tell me what ingredients i need for carne asada</i>                     |
|                  | INGREDIENTS LIST        | <i>what do you put in chicken noodle casserole</i>                         |
|                  | INGREDIENTS LIST        | <i>what all is in gumbo</i>                                                |
| KITCHEN & DINING | INGREDIENT SUBSTITUTION | <i>can i swap chili for sloppy joe mix in the recipe</i>                   |
|                  | INGREDIENT SUBSTITUTION | <i>is it possible to use starch instead of flour</i>                       |
|                  | INGREDIENT SUBSTITUTION | <i>can i substitute butter for oil</i>                                     |
| KITCHEN & DINING | COOK TIME               | <i>how long should i cook pho for</i>                                      |
|                  | COOK TIME               | <i>i need to know how long to do a pot roast in a slow cooker</i>          |
|                  | COOK TIME               | <i>how long does it take to cook ham</i>                                   |
| KITCHEN & DINING | FOOD LAST               | <i>how long can i freeze tofu before it goes bad</i>                       |
|                  | FOOD LAST               | <i>milk will go bad in my fridge when</i>                                  |
|                  | FOOD LAST               | <i>is cooked chicken still good after being refrigerated for two weeks</i> |
| KITCHEN & DINING | MEAL SUGGESTION         | <i>i would like you to give me a suggestion for a mexican meal</i>         |
|                  | MEAL SUGGESTION         | <i>i need to quick dinner suggestions</i>                                  |
|                  | MEAL SUGGESTION         | <i>can you tell me a good indian dish to make</i>                          |
| KITCHEN & DINING | RESTAURANT RESERVATION  | <i>i need a table for 3 at olive garden for 7</i>                          |
|                  | RESTAURANT RESERVATION  | <i>are there any open reservations at outback tonight</i>                  |
|                  | RESTAURANT RESERVATION  | <i>i want to have a table for 2 at the broadmore around 6</i>              |
| KITCHEN & DINING | CONFIRM RESERVATION     | <i>check on my reservation for umami at 6pm</i>                            |
|                  | CONFIRM RESERVATION     | <i>do you know if my reservation for dono is confirmed at 8 pm</i>         |
|                  | CONFIRM RESERVATION     | <i>will you check there is a reservation for laura at black pearl</i>      |
| KITCHEN & DINING | HOW BUSY                | <i>what's the table wait at applebees</i>                                  |
|                  | HOW BUSY                | <i>how busy is zippy around 12 for lunch</i>                               |
|                  | HOW BUSY                | <i>is kaya very busy at 5 pm</i>                                           |
| KITCHEN & DINING | CANCEL RESERVATION      | <i>cancel my party reservation for brad at longhorn</i>                    |
|                  | CANCEL RESERVATION      | <i>i need to cancel my dinner reservation</i>                              |
|                  | CANCEL RESERVATION      | <i>cancel my reservation for 5 at the loft</i>                             |
| KITCHEN & DINING | ACCEPT RESERVATIONS     | <i>does village inn let you make reservations</i>                          |
|                  | ACCEPT RESERVATIONS     | <i>eleven madison park takes reservations right</i>                        |
|                  | ACCEPT RESERVATIONS     | <i>find out if grub burger takes reservations</i>                          |

Table 4: Sample queries from the **KITCHEN & DINING** domain.

| Domain | Intent               | Query                                                                        |
|--------|----------------------|------------------------------------------------------------------------------|
| HOME   | SHOPPING LIST        | <i>does my shopping list have pop tarts</i>                                  |
|        | SHOPPING LIST        | <i>are carrots added to the grocery list</i>                                 |
|        | SHOPPING LIST        | <i>let me know what's on my shopping list</i>                                |
| HOME   | SHOPPING LIST UPDATE | <i>please add bananas to my shopping list unless i already did</i>           |
|        | SHOPPING LIST UPDATE | <i>cross out bananas from my shopping list and put papayas on it, please</i> |
|        | SHOPPING LIST UPDATE | <i>i'm out of paper towels so will you put that on my shopping list</i>      |
| HOME   | NEXT SONG            | <i>please play the next song</i>                                             |
|        | NEXT SONG            | <i>please put on the next number on this playlist</i>                        |
|        | NEXT SONG            | <i>move to the next song</i>                                                 |
| HOME   | PLAY MUSIC           | <i>i need for you to play my maroon 5 playlist</i>                           |
|        | PLAY MUSIC           | <i>can you play some music by the beatles for me</i>                         |
|        | PLAY MUSIC           | <i>start up some music</i>                                                   |
| HOME   | UPDATE PLAYLIST      | <i>add this tune to my jazz playlist</i>                                     |
|        | UPDATE PLAYLIST      | <i>please add roar by katy perry to my playlist</i>                          |
|        | UPDATE PLAYLIST      | <i>put what i'm listening to on my workout playlist</i>                      |
| HOME   | TODO LIST            | <i>is my todo list free</i>                                                  |
|        | TODO LIST            | <i>is cleaning the garage on my to do list</i>                               |
|        | TODO LIST            | <i>is vacuuming on my list of things to do</i>                               |
| HOME   | TODO LIST UPDATE     | <i>i don't need mowing the lawn on my to do list anymore</i>                 |
|        | TODO LIST UPDATE     | <i>empty the contents of my to do list</i>                                   |
|        | TODO LIST UPDATE     | <i>add grocery shopping to my to do list</i>                                 |
| HOME   | CALENDAR             | <i>do i have my nephew's birthday marked for november 10th</i>               |
|        | CALENDAR             | <i>have i added my doctor's appointment to my calendar</i>                   |
|        | CALENDAR             | <i>retrieve events on my calendar</i>                                        |
| HOME   | CALENDAR UPDATE      | <i>clear my calendar on feb 28</i>                                           |
|        | CALENDAR UPDATE      | <i>mark my calendar that i will be meeting steven on march 5</i>             |
|        | CALENDAR UPDATE      | <i>friday needs to be clear on my calendar</i>                               |
| HOME   | WHAT SONG            | <i>name this song</i>                                                        |
|        | WHAT SONG            | <i>i need this song title</i>                                                |
|        | WHAT SONG            | <i>who is this song that's on the stereo</i>                                 |
| HOME   | ORDER                | <i>can you please order me more plastic bags</i>                             |
|        | ORDER                | <i>could you get everything on my shopping list</i>                          |
|        | ORDER                | <i>can you go to amazon a repurchase my last purchase</i>                    |
| HOME   | ORDER STATUS         | <i>can you monitor my package's progress</i>                                 |
|        | ORDER STATUS         | <i>i need to track my order</i>                                              |
|        | ORDER STATUS         | <i>have my goods been delivered yet</i>                                      |
| HOME   | REMINDER             | <i>tell me my reminders</i>                                                  |
|        | REMINDER             | <i>do i have a reminder for our neighbor's anniversary</i>                   |
|        | REMINDER             | <i>i wanted to remember what again</i>                                       |
| HOME   | REMINDER UPDATE      | <i>remind me to call my mother saturday morning</i>                          |
|        | REMINDER UPDATE      | <i>can you set me a reminder</i>                                             |
|        | REMINDER UPDATE      | <i>set a reminder to go dress shopping</i>                                   |
| HOME   | SMART HOME           | <i>can you please turn on my furnace</i>                                     |
|        | SMART HOME           | <i>can you turn the oven to 350</i>                                          |
|        | SMART HOME           | <i>did i lock the doors</i>                                                  |

Table 5: Sample queries from the **HOME** domain.

| Domain         | Intent               | Query                                                                    |
|----------------|----------------------|--------------------------------------------------------------------------|
| AUTO & COMMUTE | TRAFFIC              | <i>is there much traffic between here and work right now</i>             |
|                | TRAFFIC              | <i>is there traffic on dove road</i>                                     |
|                | TRAFFIC              | <i>is there gridlock on the street up to the stadium</i>                 |
| AUTO & COMMUTE | DIRECTIONS           | <i>how do i get to the train by foot</i>                                 |
|                | DIRECTIONS           | <i>find the closest cvs near galleria mall</i>                           |
|                | DIRECTIONS           | <i>where is the closest subway entrance to me to go to brooklyn</i>      |
| AUTO & COMMUTE | GAS                  | <i>is my gas tank full or empty</i>                                      |
|                | GAS                  | <i>how long before i'm on e</i>                                          |
|                | GAS                  | <i>what level is my gas tank at</i>                                      |
| AUTO & COMMUTE | GAS TYPE             | <i>can you tell me what gas this car takes</i>                           |
|                | GAS TYPE             | <i>what is the proper fuel type for my car</i>                           |
|                | GAS TYPE             | <i>what kind of gas does my car need</i>                                 |
| AUTO & COMMUTE | DISTANCE             | <i>how long will it take to walk to the safeway in the strip mall</i>    |
|                | DISTANCE             | <i>tell me how far i am from home in time and miles</i>                  |
|                | DISTANCE             | <i>how long will it take to get to phoenix</i>                           |
| AUTO & COMMUTE | CURRENT LOCATION     | <i>what's my location</i>                                                |
|                | CURRENT LOCATION     | <i>list my current gps coordinates</i>                                   |
|                | CURRENT LOCATION     | <i>help me find where i am</i>                                           |
| AUTO & COMMUTE | MPG                  | <i>what is my car's mpg</i>                                              |
|                | MPG                  | <i>what is the gas mileage of my car</i>                                 |
|                | MPG                  | <i>how is the car's fuel economy</i>                                     |
| AUTO & COMMUTE | OIL CHANGE WHEN      | <i>when is the next time i need to get an oil change</i>                 |
|                | OIL CHANGE WHEN      | <i>is my oil change coming up soon</i>                                   |
|                | OIL CHANGE WHEN      | <i>when does this car need oil changes</i>                               |
| AUTO & COMMUTE | OIL CHANGE HOW       | <i>procedure to change oil in car</i>                                    |
|                | OIL CHANGE HOW       | <i>i want to know how to change my oil</i>                               |
|                | OIL CHANGE HOW       | <i>can you find some instructions on how to change my oil</i>            |
| AUTO & COMMUTE | JUMP START           | <i>how can i jump start my car if my battery is dead</i>                 |
|                | JUMP START           | <i>can i get my car jumped for this dead battery</i>                     |
|                | JUMP START           | <i>my car battery died, what should i do</i>                             |
| AUTO & COMMUTE | UBER                 | <i>find me an uber to the liberty bell</i>                               |
|                | UBER                 | <i>i need an uber for 5 to go to the concerthall</i>                     |
|                | UBER                 | <i>i'm too drunk to drive and need an uber home</i>                      |
| AUTO & COMMUTE | SCHEDULE MAINTENANCE | <i>my car needs maintenance schedulede</i>                               |
|                | SCHEDULE MAINTENANCE | <i>my check engine light is on and someone needs to look at it</i>       |
|                | SCHEDULE MAINTENANCE | <i>is there a location i can schedule to check out my tires</i>          |
| AUTO & COMMUTE | LAST MAINTENANCE     | <i>can you find the date of my last oil change</i>                       |
|                | LAST MAINTENANCE     | <i>tell me when someone looked at my car last</i>                        |
|                | LAST MAINTENANCE     | <i>i need to know the date of my car's last visit to the shop please</i> |
| AUTO & COMMUTE | TIRE PRESSURE        | <i>give me the tire pressure for the car</i>                             |
|                | TIRE PRESSURE        | <i>my tires are how low on air</i>                                       |
|                | TIRE PRESSURE        | <i>are my tires filled enough</i>                                        |
| AUTO & COMMUTE | TIRE CHANGE          | <i>when is the next time i should get my tires changed</i>               |
|                | TIRE CHANGE          | <i>on feb 3rd i changed my tires are they still good</i>                 |
|                | TIRE CHANGE          | <i>when is it time for a change in tires</i>                             |

Table 6: Sample queries from the AUTO & COMMUTE domain.

| Domain | Intent              | Query                                                                                   |
|--------|---------------------|-----------------------------------------------------------------------------------------|
| TRAVEL | BOOK FLIGHT         | <i>book a flight to los angeles from las vegas on american airlines</i>                 |
|        | BOOK FLIGHT         | <i>i need a flight for under 300 from pittsburgh to atlanta</i>                         |
|        | BOOK FLIGHT         | <i>book a flight from philadelphia to atlanta on june 5th and returning on june 8th</i> |
| TRAVEL | BOOK HOTEL          | <i>i need a room in indianapolis near the track from may 2nd through the 5th</i>        |
|        | BOOK HOTEL          | <i>make a reservation to stay in cali from november 11 to 15</i>                        |
|        | BOOK HOTEL          | <i>please book me a room in austin from tomorrow to the 2nd</i>                         |
| TRAVEL | CAR RENTAL          | <i>i want to reserve a convertible from july 2nd through july 18th for los angeles</i>  |
|        | CAR RENTAL          | <i>please help me book a rental car for nashville</i>                                   |
|        | CAR RENTAL          | <i>i need a rental car for sfo from friday to saturday</i>                              |
| TRAVEL | TRAVEL SUGGESTION   | <i>what are some interesting things i can do while in raleigh</i>                       |
|        | TRAVEL SUGGESTION   | <i>i want to know about tourist places for bangkok</i>                                  |
|        | TRAVEL SUGGESTION   | <i>what are some fun cheap activities to do in colorado</i>                             |
| TRAVEL | TRAVEL ALERT        | <i>does macedonia have any travel alerts i should be aware of</i>                       |
|        | TRAVEL ALERT        | <i>tell me about any travel alerts issued for germany</i>                               |
|        | TRAVEL ALERT        | <i>argentina travel alert yes or no</i>                                                 |
| TRAVEL | TRAVEL NOTIFICATION | <i>i need to let my bank know i am traveling to paris</i>                               |
|        | TRAVEL NOTIFICATION | <i>inform my bank that i'll be going to europe</i>                                      |
|        | TRAVEL NOTIFICATION | <i>let my bank know i will be on travel to fes</i>                                      |
| TRAVEL | CARRY ON            | <i>i am flying to finland and wanna know the carry-on rules</i>                         |
|        | CARRY ON            | <i>tell me the the carry-on restrictions for american airlines</i>                      |
|        | CARRY ON            | <i>does more than one carry on cost extra at ryanair</i>                                |
| TRAVEL | TIMEZONE            | <i>what is the time zone of france</i>                                                  |
|        | TIMEZONE            | <i>what timezone is philadelphia in</i>                                                 |
|        | TIMEZONE            | <i>miami time zone is what</i>                                                          |
| TRAVEL | VACCINES            | <i>do i need any vaccinations before going to indonesia</i>                             |
|        | VACCINES            | <i>should i get any shots before i go to kenya</i>                                      |
|        | VACCINES            | <i>are shots needed for uk travel</i>                                                   |
| TRAVEL | TRANSLATE           | <i>how does one say wonderful in german</i>                                             |
|        | TRANSLATE           | <i>how do you say please in french</i>                                                  |
|        | TRANSLATE           | <i>how would i say i am lost if i were japanese</i>                                     |
| TRAVEL | FLIGHT STATUS       | <i>what's the status of my virgin airlines flight</i>                                   |
|        | FLIGHT STATUS       | <i>when is my flight scheduled to board</i>                                             |
|        | FLIGHT STATUS       | <i>at what time is my flight scheduled to land</i>                                      |
| TRAVEL | INTERNATIONAL VISA  | <i>do i need an international visa to get into italy</i>                                |
|        | INTERNATIONAL VISA  | <i>does the uk require a travel visa</i>                                                |
|        | INTERNATIONAL VISA  | <i>i need to know if i need a visa to travel to el salvador</i>                         |
| TRAVEL | LOST LUGGAGE        | <i>there are some questionable charges on my card</i>                                   |
|        | LOST LUGGAGE        | <i>there's a shady charge from comcast on my account</i>                                |
|        | LOST LUGGAGE        | <i>i need to report fraudulent activity on my card</i>                                  |
| TRAVEL | PLUG TYPE           | <i>what would be the best way to deal with lost luggage</i>                             |
|        | PLUG TYPE           | <i>what should i do about losing my luggage</i>                                         |
|        | PLUG TYPE           | <i>my luggage is missing off of american airlines flight ab123 out of chicago</i>       |
| TRAVEL | EXCHANGE RATE       | <i>how much is 100 dollars in euros</i>                                                 |
|        | EXCHANGE RATE       | <i>how much is usd vs cad</i>                                                           |
|        | EXCHANGE RATE       | <i>tell me the exchange rate between rubles and dollars</i>                             |

Table 7: Sample queries from the **TRAVEL** domain.

| Domain  | Intent                 | Query                                                                  |
|---------|------------------------|------------------------------------------------------------------------|
| UTILITY | TIME                   | <i>please give me the time in tanzania at this moment</i>              |
|         | TIME                   | <i>what is the current time</i>                                        |
|         | TIME                   | <i>what's the clock say</i>                                            |
| UTILITY | ALARM                  | <i>please set me an alarm</i>                                          |
|         | ALARM                  | <i>can you set up alarms for one in the afternoon and ten at night</i> |
|         | ALARM                  | <i>set alarm</i>                                                       |
| UTILITY | SHARE LOCATION         | <i>share my location with brad and terry</i>                           |
|         | SHARE LOCATION         | <i>let coach know where i am</i>                                       |
|         | SHARE LOCATION         | <i>how do i share my location with noel</i>                            |
| UTILITY | FIND PHONE             | <i>can you help me locate my phone</i>                                 |
|         | FIND PHONE             | <i>can you find my phone</i>                                           |
|         | FIND PHONE             | <i>tell me where i left my phone</i>                                   |
| UTILITY | WEATHER                | <i>tell me the forecast</i>                                            |
|         | WEATHER                | <i>is it going to rain tomorrow</i>                                    |
|         | WEATHER                | <i>how cold is it in wisconsin today</i>                               |
| UTILITY | TEXT                   | <i>please send a text to danny saying that i'm running late</i>        |
|         | TEXT                   | <i>i need leslie to be texted saying have a good day</i>               |
|         | TEXT                   | <i>send a text to mom saying i'm on my way</i>                         |
| UTILITY | SPELLING               | <i>how do you spell out espresso</i>                                   |
|         | SPELLING               | <i>tell me how handkerchief is spelled</i>                             |
|         | SPELLING               | <i>tell how many a's are in the word happiness</i>                     |
| UTILITY | MAKE CALL              | <i>dial up dominos pizza</i>                                           |
|         | MAKE CALL              | <i>i need you to phone sal</i>                                         |
|         | MAKE CALL              | <i>call mom</i>                                                        |
| UTILITY | TIMER                  | <i>set the timer for 10 minutes</i>                                    |
|         | TIMER                  | <i>set 60 minutes for oven please</i>                                  |
|         | TIMER                  | <i>i want a timer set</i>                                              |
| UTILITY | DATE                   | <i>i would like to know what today's date is</i>                       |
|         | DATE                   | <i>current date</i>                                                    |
|         | DATE                   | <i>tell me what day it is</i>                                          |
| UTILITY | CALCULATOR             | <i>what is 300 divided by 42</i>                                       |
|         | CALCULATOR             | <i>find square root of 453</i>                                         |
|         | CALCULATOR             | <i>add up 8 and 7</i>                                                  |
| UTILITY | MEASUREMENT CONVERSION | <i>what is the total number of pints in two quarts</i>                 |
|         | MEASUREMENT CONVERSION | <i>how many ounces in a liter</i>                                      |
|         | MEASUREMENT CONVERSION | <i>what's 8 ounces in cups</i>                                         |
| UTILITY | FLIP COIN              | <i>can you flip a coin for me</i>                                      |
|         | FLIP COIN              | <i>throw a coin in the air</i>                                         |
|         | FLIP COIN              | <i>flip a coin, i call heads</i>                                       |
| UTILITY | ROLL DICE              | <i>roll a dice that has seven sides</i>                                |
|         | ROLL DICE              | <i>roll a die please</i>                                               |
|         | ROLL DICE              | <i>will you roll a d20</i>                                             |
| UTILITY | DEFINITION             | <i>define antebellum</i>                                               |
|         | DEFINITION             | <i>what does circuitous mean</i>                                       |
|         | DEFINITION             | <i>can you tell me what obsolescence means</i>                         |

Table 8: Sample queries from the UTILITY domain.



| Domain | Intent             | Query                                                                            |
|--------|--------------------|----------------------------------------------------------------------------------|
| WORK   | DIRECT DEPOSIT     | <i>how do i set up a direct deposit</i>                                          |
|        | DIRECT DEPOSIT     | <i>how to activate direct deposit to chase account</i>                           |
|        | DIRECT DEPOSIT     | <i>what information do i need to direct deposit my paycheck</i>                  |
| WORK   | PTO REQUEST        | <i>how do i put in a pto request for the first to the ninth</i>                  |
|        | PTO REQUEST        | <i>how do i schedule vacation days</i>                                           |
|        | PTO REQUEST        | <i>may i take a pto on february 7 and 8</i>                                      |
| WORK   | TAXES              | <i>how much do i owe for state taxes</i>                                         |
|        | TAXES              | <i>do i pay a lot of taxes on my income</i>                                      |
|        | TAXES              | <i>how much will i pay in federal taxes</i>                                      |
| WORK   | PAYDAY             | <i>how long until my paycheck shows up</i>                                       |
|        | PAYDAY             | <i>when did i last collect my salary</i>                                         |
|        | PAYDAY             | <i>when do i get paid for my work</i>                                            |
| WORK   | W2                 | <i>where can i get my w2 from</i>                                                |
|        | W2                 | <i>where do i go to get that work tax form thing</i>                             |
|        | W2                 | <i>how can i get get a copy of my w2 for tax purposes</i>                        |
| WORK   | PTO BALANCE        | <i>how many vacation days do i still have available</i>                          |
|        | PTO BALANCE        | <i>what do my vacation days amount to</i>                                        |
|        | PTO BALANCE        | <i>how many pto days do i have left</i>                                          |
| WORK   | PTO REQUEST STATUS | <i>does my vacation have approval</i>                                            |
|        | PTO REQUEST STATUS | <i>please let me know the status of my vacation request</i>                      |
|        | PTO REQUEST STATUS | <i>any news for me regarding my day off request</i>                              |
| WORK   | NEXT HOLIDAY       | <i>when is the next scheduled holiday</i>                                        |
|        | NEXT HOLIDAY       | <i>when is the next office holiday</i>                                           |
|        | NEXT HOLIDAY       | <i>when can i expect my next day off</i>                                         |
| WORK   | INSURANCE          | <i>what health benefits can i use</i>                                            |
|        | INSURANCE          | <i>what benefits are provided by my insurance</i>                                |
|        | INSURANCE          | <i>i'm curious what health plan i'm on</i>                                       |
| WORK   | INSURANCE CHANGE   | <i>i would like to change my insurance policy</i>                                |
|        | INSURANCE CHANGE   | <i>help me change my insurance plan</i>                                          |
|        | INSURANCE CHANGE   | <i>i would like to change my insurance policy</i>                                |
| WORK   | SCHEDULE MEETING   | <i>tell me how i can schedule a meeting</i>                                      |
|        | SCHEDULE MEETING   | <i>please help me schedule a meeting with john love at 9 am tomorrow</i>         |
|        | SCHEDULE MEETING   | <i>would you be able to help me with a meeting room on wednesday at 3pm</i>      |
| WORK   | PTO USED           | <i>what is the total number of days that i have taken off work since january</i> |
|        | PTO USED           | <i>how much of my pto is gone</i>                                                |
|        | PTO USED           | <i>i want to know how many vacation days i have used</i>                         |
| WORK   | MEETING SCHEDULE   | <i>are there meetings scheduled for today</i>                                    |
|        | MEETING SCHEDULE   | <i>are there meetings from 1 to 5 pm</i>                                         |
|        | MEETING SCHEDULE   | <i>my meeting with alice is scheduled for when</i>                               |
| WORK   | ROLLOVER 401K      | <i>is it possible to rollover my 401k</i>                                        |
|        | ROLLOVER 401K      | <i>401k rollover help</i>                                                        |
|        | ROLLOVER 401K      | <i>explain to me how transferring my 401k works</i>                              |
| WORK   | INCOME             | <i>please give me my salary figure</i>                                           |
|        | INCOME             | <i>what is the total amount of my paychecks over the last year</i>               |
|        | INCOME             | <i>how much do i make every 2 weeks</i>                                          |

Table 9: Sample queries from the **WORK** domain.

| Domain     | Intent                | Query                                                  |
|------------|-----------------------|--------------------------------------------------------|
| SMALL TALK | GREETING              | <i>how are you doing</i>                               |
|            | GREETING              | <i>it is good to see you</i>                           |
|            | GREETING              | <i>hey what's up</i>                                   |
| SMALL TALK | GOODBYE               | <i>glad we got to talk</i>                             |
|            | GOODBYE               | <i>talk to you later</i>                               |
|            | GOODBYE               | <i>adios</i>                                           |
| SMALL TALK | TELL JOKE             | <i>what's a good joke</i>                              |
|            | TELL JOKE             | <i>i want to hear something funny</i>                  |
|            | TELL JOKE             | <i>can you tell me a joke about politicians</i>        |
| SMALL TALK | WHERE ARE YOU FROM    | <i>from where do you come</i>                          |
|            | WHERE ARE YOU FROM    | <i>where do you call home</i>                          |
|            | WHERE ARE YOU FROM    | <i>in what place are you originally from</i>           |
| SMALL TALK | HOW OLD ARE YOU       | <i>may i ask your age</i>                              |
|            | HOW OLD ARE YOU       | <i>what do people call you</i>                         |
|            | HOW OLD ARE YOU       | <i>can i have your name</i>                            |
| SMALL TALK | WHAT IS YOUR NAME     | <i>what was your name again</i>                        |
|            | WHAT IS YOUR NAME     | <i>read my bill balances</i>                           |
|            | WHAT IS YOUR NAME     | <i>how much do i owe for my gas and phone bills</i>    |
| SMALL TALK | WHO MADE YOU          | <i>who is your maker</i>                               |
|            | WHO MADE YOU          | <i>which company were you designed by</i>              |
|            | WHO MADE YOU          | <i>who were you created by</i>                         |
| SMALL TALK | THANK YOU             | <i>thanks for helping me</i>                           |
|            | THANK YOU             | <i>i appreciate you doing that</i>                     |
|            | THANK YOU             | <i>special thanks to you</i>                           |
| SMALL TALK | WHAT CAN I ASK YOU    | <i>what kinds of questions can you answer</i>          |
|            | WHAT CAN I ASK YOU    | <i>what topics can i ask you about</i>                 |
|            | WHAT CAN I ASK YOU    | <i>how can you help me</i>                             |
| SMALL TALK | WHAT ARE YOUR HOBBIES | <i>what are your hobbies in life</i>                   |
|            | WHAT ARE YOUR HOBBIES | <i>do you have hobbies</i>                             |
|            | WHAT ARE YOUR HOBBIES | <i>what do you like to do during your leisure time</i> |
| SMALL TALK | DO YOU HAVE PETS      | <i>what type of pet do you have</i>                    |
|            | DO YOU HAVE PETS      | <i>tell me about your pets</i>                         |
|            | DO YOU HAVE PETS      | <i>what animals do you have</i>                        |
| SMALL TALK | ARE YOU A BOT         | <i>are your real or artificial</i>                     |
|            | ARE YOU A BOT         | <i>are you actually a bot</i>                          |
|            | ARE YOU A BOT         | <i>are you a living being</i>                          |
| SMALL TALK | MEANING OF LIFE       | <i>i want to know the meaning of life</i>              |
|            | MEANING OF LIFE       | <i>what's life mean to you</i>                         |
|            | MEANING OF LIFE       | <i>do you know the deeper meaning of life</i>          |
| SMALL TALK | WHO DO YOU WORK FOR   | <i>who do you say you work for</i>                     |
|            | WHO DO YOU WORK FOR   | <i>who is the boss of you</i>                          |
|            | WHO DO YOU WORK FOR   | <i>who pay your salary</i>                             |
| SMALL TALK | FUN FACT              | <i>tell me a fun fact about cars</i>                   |
|            | FUN FACT              | <i>tell me today's fun fact</i>                        |
|            | FUN FACT              | <i>what's something interesting about bees</i>         |

Table 10: Sample queries from the SMALL TALK domain.

| Domain | Intent           | Query                                                           |
|--------|------------------|-----------------------------------------------------------------|
| META   | CHANGE AI NAME   | <i>rename yourself to betty</i>                                 |
|        | CHANGE AI NAME   | <i>change your name setting to plato</i>                        |
|        | CHANGE AI NAME   | <i>how do i change the name you came with to something else</i> |
| META   | CHANGE USER NAME | <i>bob is my name now</i>                                       |
|        | CHANGE USER NAME | <i>could you call me a different name</i>                       |
|        | CHANGE USER NAME | <i>call me mike from now on</i>                                 |
| META   | CANCEL           | <i>stop this process</i>                                        |
|        | CANCEL           | <i>stop talking</i>                                             |
|        | CANCEL           | <i>command cancel</i>                                           |
| META   | USER NAME        | <i>you refer to me as what</i>                                  |
|        | USER NAME        | <i>say my name if you know it</i>                               |
|        | USER NAME        | <i>how did you save my name</i>                                 |
| META   | RESET SETTINGS   | <i>make the settings go back to the original</i>                |
|        | RESET SETTINGS   | <i>go back to factory settings please</i>                       |
|        | RESET SETTINGS   | <i>do a hard reset</i>                                          |
| META   | WHISPER MODE     | <i>switch off whisper mode</i>                                  |
|        | WHISPER MODE     | <i>start whisper mode</i>                                       |
|        | WHISPER MODE     | <i>change sound setting to whisper</i>                          |
| META   | REPEAT           | <i>repeat that for me</i>                                       |
|        | REPEAT           | <i>please say that again</i>                                    |
|        | REPEAT           | <i>i'm sorry please repeat the question</i>                     |
| META   | NO               | <i>hell nah</i>                                                 |
|        | NO               | <i>no good</i>                                                  |
|        | NO               | <i>absolutely not</i>                                           |
| META   | YES              | <i>yep</i>                                                      |
|        | YES              | <i>that is affirmative</i>                                      |
|        | YES              | <i>correct</i>                                                  |
| META   | MAYBE            | <i>i'm not actually sure</i>                                    |
|        | MAYBE            | <i>perhaps</i>                                                  |
|        | MAYBE            | <i>maybe it does</i>                                            |
| META   | CHANGE LANGUAGE  | <i>switch the language setting over to german</i>               |
|        | CHANGE LANGUAGE  | <i>i want you to speak in french</i>                            |
|        | CHANGE LANGUAGE  | <i>please respond in english</i>                                |
| META   | CHANGE ACCENT    | <i>could you use a male voice</i>                               |
|        | CHANGE ACCENT    | <i>go ahead and switch to the female voice</i>                  |
|        | CHANGE ACCENT    | <i>please change your accent to the male british one</i>        |
| META   | CHANGE VOLUME    | <i>raise the volume to 4 please</i>                             |
|        | CHANGE VOLUME    | <i>please increase your speaker volume</i>                      |
|        | CHANGE VOLUME    | <i>can you turn this down</i>                                   |
| META   | CHANGE SPEED     | <i>can i speed up your voiced</i>                               |
|        | CHANGE SPEED     | <i>can you speak faster</i>                                     |
|        | CHANGE SPEED     | <i>your speech slower it</i>                                    |
| META   | SYNC DEVICE      | <i>can you connect to my phone</i>                              |
|        | SYNC DEVICE      | <i>don't be synced to my phone anymore</i>                      |
|        | SYNC DEVICE      | <i>unsync from my phone please</i>                              |

Table 11: Sample queries from the META domain.

| Domain       | Intent       | Query                                                             |
|--------------|--------------|-------------------------------------------------------------------|
| OUT-OF-SCOPE | OUT-OF-SCOPE | <i>how much has the dow changed today</i>                         |
| OUT-OF-SCOPE | OUT-OF-SCOPE | <i>how many prime numbers are there between 0 and 100</i>         |
| OUT-OF-SCOPE | OUT-OF-SCOPE | <i>how is my driving</i>                                          |
| OUT-OF-SCOPE | OUT-OF-SCOPE | <i>what is the best way to clean ceiling fans</i>                 |
| OUT-OF-SCOPE | OUT-OF-SCOPE | <i>can you auto-pilot the car</i>                                 |
| OUT-OF-SCOPE | OUT-OF-SCOPE | <i>do i have overdraft protection</i>                             |
| OUT-OF-SCOPE | OUT-OF-SCOPE | <i>i need to update my address</i>                                |
| OUT-OF-SCOPE | OUT-OF-SCOPE | <i>go and check the fridge</i>                                    |
| OUT-OF-SCOPE | OUT-OF-SCOPE | <i>who invented custardo</i>                                      |
| OUT-OF-SCOPE | OUT-OF-SCOPE | <i>open up internet browser</i>                                   |
| OUT-OF-SCOPE | OUT-OF-SCOPE | <i>where did abraham lincoln live</i>                             |
| OUT-OF-SCOPE | OUT-OF-SCOPE | <i>get me dwight howard shooting average</i>                      |
| OUT-OF-SCOPE | OUT-OF-SCOPE | <i>are any justice league movies coming out</i>                   |
| OUT-OF-SCOPE | OUT-OF-SCOPE | <i>please explain the catch rule to me</i>                        |
| OUT-OF-SCOPE | OUT-OF-SCOPE | <i>how long does it take the irs to issue a tax refund</i>        |
| OUT-OF-SCOPE | OUT-OF-SCOPE | <i>are androids expensive</i>                                     |
| OUT-OF-SCOPE | OUT-OF-SCOPE | <i>what cryptocurrency gained the most in 2018</i>                |
| OUT-OF-SCOPE | OUT-OF-SCOPE | <i>do ducks eat meat, vegetables, or both</i>                     |
| OUT-OF-SCOPE | OUT-OF-SCOPE | <i>how can i use make up to cover a cut on my cheek</i>           |
| OUT-OF-SCOPE | OUT-OF-SCOPE | <i>set a warning for when my bank account starts running low</i>  |
| OUT-OF-SCOPE | OUT-OF-SCOPE | <i>am kind of busy now</i>                                        |
| OUT-OF-SCOPE | OUT-OF-SCOPE | <i>how to unclog a drain</i>                                      |
| OUT-OF-SCOPE | OUT-OF-SCOPE | <i>what size wipers does this car take</i>                        |
| OUT-OF-SCOPE | OUT-OF-SCOPE | <i>what are some ways to reduce spending</i>                      |
| OUT-OF-SCOPE | OUT-OF-SCOPE | <i>where does jelly come from</i>                                 |
| OUT-OF-SCOPE | OUT-OF-SCOPE | <i>is yoga healthy</i>                                            |
| OUT-OF-SCOPE | OUT-OF-SCOPE | <i>are hawks domesticated or wild</i>                             |
| OUT-OF-SCOPE | OUT-OF-SCOPE | <i>do you know if it is possible to close my savings account</i>  |
| OUT-OF-SCOPE | OUT-OF-SCOPE | <i>what languages are considered semitic</i>                      |
| OUT-OF-SCOPE | OUT-OF-SCOPE | <i>how do you know if a mushroom is edible</i>                    |
| OUT-OF-SCOPE | OUT-OF-SCOPE | <i>is va treatment free for veterans</i>                          |
| OUT-OF-SCOPE | OUT-OF-SCOPE | <i>is the bachelor on tonight</i>                                 |
| OUT-OF-SCOPE | OUT-OF-SCOPE | <i>what is npr reporting on right now</i>                         |
| OUT-OF-SCOPE | OUT-OF-SCOPE | <i>change my seat to an window seat for my flight on monday</i>   |
| OUT-OF-SCOPE | OUT-OF-SCOPE | <i>please save my draft for me so i can work on it later</i>      |
| OUT-OF-SCOPE | OUT-OF-SCOPE | <i>which state has the best airlines</i>                          |
| OUT-OF-SCOPE | OUT-OF-SCOPE | <i>can you forward this email to my boss</i>                      |
| OUT-OF-SCOPE | OUT-OF-SCOPE | <i>how do you store my card information</i>                       |
| OUT-OF-SCOPE | OUT-OF-SCOPE | <i>can you clock me in</i>                                        |
| OUT-OF-SCOPE | OUT-OF-SCOPE | <i>how many students attend ucsb</i>                              |
| OUT-OF-SCOPE | OUT-OF-SCOPE | <i>how can i get involved in restaurant marketing</i>             |
| OUT-OF-SCOPE | OUT-OF-SCOPE | <i>how do the anti-lock brakes work</i>                           |
| OUT-OF-SCOPE | OUT-OF-SCOPE | <i>why can't you divide by zero</i>                               |
| OUT-OF-SCOPE | OUT-OF-SCOPE | <i>show me all contacts</i>                                       |
| OUT-OF-SCOPE | OUT-OF-SCOPE | <i>can you show me my 3-digit credit card verification number</i> |

Table 12: Sample **OUT-OF-SCOPE** queries.

---

*are barcode symbologies specifically designed for this application*  
*virtually all solidarity leaders and many affiliated intellectuals were arrested or detained*  
*kimuras own hq left by land*  
*fitzgerald had inferred this hypothesis from a paper by oliver heaviside*  
*asbury wrote in his journal*  
*the christmas season immediately follows advent*  
*he and trinity are now lovers*  
*her distinctive voice and persona are frequently parodied*  
*cattle ranchers later feuded and discouraged the wandering sheepherders*  
*the ground substance is mostly made up of chondroitin sulfate and osteocalcin*  
*it has about 5000 inhabitants*  
*gibson township is a township in cameron county pennsylvania pennsylvania united states*  
*in august 1974 the tigers sold northrup to the montreal expos*  
*the danish distillery aalborg makes an akvavit distilled with amber*  
*the line will be extended only with substantial additional government funding*  
*though only serving for five years whitlock was very influential to simons rock development*

---

Table 13: Examples from the data used in the wiki aug oos-binary approach.
